# Supplementary material for: A novel hierarchical book-like structured sodium manganite for high-stable sodium-ion batteries
Source: Royal Society of Chemistry journal article supplement (doi:10.1039/d2ra05524d), 2023-01-01
Supplement: d2ra05524d1.pdf [file d2ra05524d1.pdf]

## Electronic Supplementary Information

### A novel hierarchical book-like structured sodium manganite for high-stable sodium-ion batteries

Yue Zhang, Hang Wang, Yakun Tang, Yudai Huang and Dianzeng Jia\*

*State Key Laboratory of Chemistry and Utilization of Carbon Based Energy*

*Resources; College of Chemistry, Xinjiang University, Urumqi, 830017, Xinjiang, PR*

*China.*

*Email: [jdz@xju.edu.cn](mailto:jdz@xju.edu.cn)*

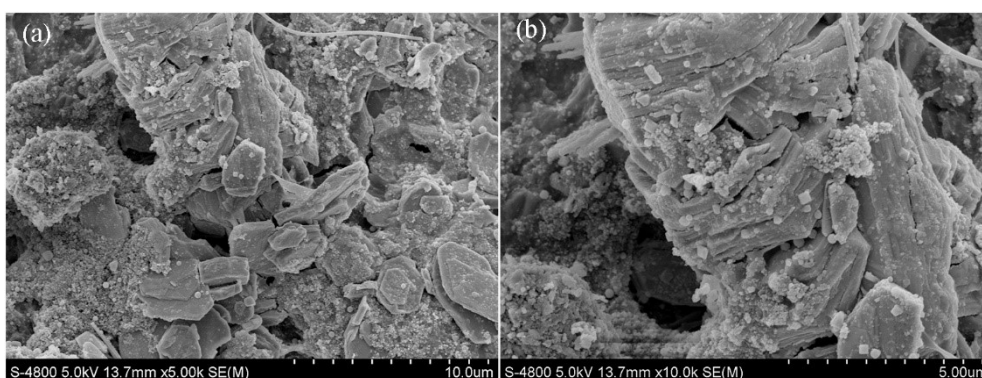

**Fig. S1.** (a, b) SEM images of P2-Na<sub>0.7</sub>MnO<sub>2.05</sub> sample after 100 cycles at 1 C.

The Na<sup>+</sup> diffusion coefficient (D) can be calculated from the plots in the low frequency region based on the following two equations:

$$D = R^2 T^2 / 2 A^2 n^4 F^4 C^2 \sigma^2 \quad (1)$$

$$Z' = \sigma \omega^{-0.5} + R_s + R_{ct} \quad (2)$$

where, R is the universal gas constant, T is the absolute temperature, n is the number of electrons participating in the electrochemical reaction, A is the surface area of the electrode, F is the Faraday constant, C is the molar concentration of Na<sup>+</sup>, and  $\sigma$  is the Warburg coefficient, Z' is the real part of the EIS, R<sub>s</sub> is the resistance between the electrolyte and electrode, and  $\omega$  is the angular frequency in the low frequency region.

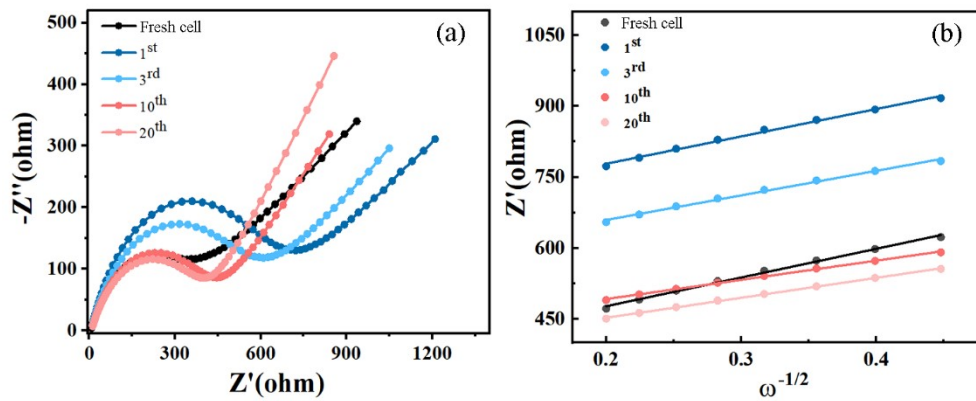

**Fig. S2.** (a) Nyquist plots and (b) the plots of impedance as a function of the inverse square root of angular frequency in the Warburg region for the P2-Na<sub>0.7</sub>MnO<sub>2.05</sub> at various cycling intervals.
